# Supplementary material for: Universally applicable, quantitative PCR method utilizing fluorescent nucleobase analogs
Source: Royal Society of Chemistry journal article supplement (doi:10.1039/c8ra06675b), 2018-01-01
Supplement: c8ra06675b1.pdf [file c8ra06675b1.pdf]

Electronic supplementary information

**Universally applicable, quantitative PCR method utilizing fluorescent  
nucleobase analogs**

Hyo Yong Kim<sup>1†</sup>, Taihua Li<sup>2†</sup>, Cheulhee Jung<sup>1</sup>, Rongzhan Fu<sup>1</sup>, Dae-Yeon Cho<sup>3</sup>, Ki Soo Park<sup>4\*</sup>, and Hyun Gyu Park<sup>1\*</sup>

<sup>1</sup> Department of Chemical and Biomolecular Engineering (BK21 Program), KAIST, 291 Daehak-ro, Yuseong-gu, Daejeon 305-701, Republic of Korea

<sup>2</sup> College of Biology and the Environment, Co-Innovation Centre for Sustainable Forestry in Southern China, Nanjing Forestry University, 159 Longpan road, Nanjing, Jiangsu, 210-037, China

<sup>3</sup> Labgenomics Clinical Research Institute, Labgenomics Co. Ltd., Yong-In, 449-795, Republic of Korea

<sup>4</sup> Department of Biological Engineering, College of Engineering, Konkuk University, Seoul 05029, Republic of Korea

\* Corresponding authors:

E-mail: [hgpark@kaist.ac.kr](mailto:hgpark@kaist.ac.kr) (H.G. Park); Tel: +82-42-350-3932; Fax: +82-42-350-3910.

E-mail: [kskonkuk@gmail.com](mailto:kskonkuk@gmail.com) (K.S. Park); Tel: +82-2-450-3742; Fax: +82-2-450-3742.

† These authors equally contributed to this work.

**Table S1** Oligonucleotide sequences employed in this study.

| Experiment              | Oligonucleotide name                              | Sequence (5'→3')                                                  |                                                                                             |
|-------------------------|---------------------------------------------------|-------------------------------------------------------------------|---------------------------------------------------------------------------------------------|
| Optimization            | 1 PdC-incorporated DNA                            | TCC TCA GAA GTT TAT GCA <b>X</b> <sup>(a)</sup> T                 |                                                                                             |
|                         | 2 PdCs-incorporated DNA                           | TCC <b>TXA</b> GAA GTT TAT GCA <b>XT</b>                          |                                                                                             |
|                         | 3 PdCs-incorporated DNA                           | <b>TCX TXA</b> GAA GTT TAT GCA <b>XT</b>                          |                                                                                             |
| PdC-based qPCR          | Signal-off                                        | F primer                                                          | CTA GGC GTT TGT ACT CCG TGA                                                                 |
|                         |                                                   | R primer                                                          | <b>TCX TXA</b> GAA GTT TAT GCA <b>XT</b>                                                    |
|                         | Signal-on                                         | F primer                                                          | <b>AGA GAG AGA GAG AGA GAG</b><br><b>AG</b> <sup>(b)</sup> C AAT GGC TAA TGC CGG<br>ATA CGC |
|                         |                                                   | R primer                                                          | GGT ACC GTC AGT CTG CAA T                                                                   |
|                         |                                                   | UFB probe                                                         | CTC TCT CTC TCT <b>XTX TXT</b> CT                                                           |
| TaqMan probe-based qPCR | F primer for CT                                   | CTA GGC GTT TGT ACT CCG TCA                                       |                                                                                             |
|                         | R primer for CT                                   | TGG TGG GGT TAA GGC AAA TCG                                       |                                                                                             |
|                         | TaqMan probe for CT                               | [FAM] <sup>(c)</sup> CCG CAC GTT CTC TCA<br>AGC AGG ACT ACA [BHQ] |                                                                                             |
|                         | F primer for MH                                   | GCC ACA TTG GGA CTG AGA TAC<br>G                                  |                                                                                             |
|                         | R primer for MH                                   | ACA GCA CTT TAC AAT CCG AAG<br>ACC                                |                                                                                             |
| TaqMan probe for MH     | [FAM] TGC ACG CTG TGT CGC TCC<br>ATC AAG CT [BHQ] |                                                                   |                                                                                             |

(a) The bold X indicates PdC.

(b) The red-colored sequences indicate the 5'-overhang sequences where the UFB probe binds.

(c) The bracket indicates the labeling of fluorophore (FAM) and quencher (BHQ).

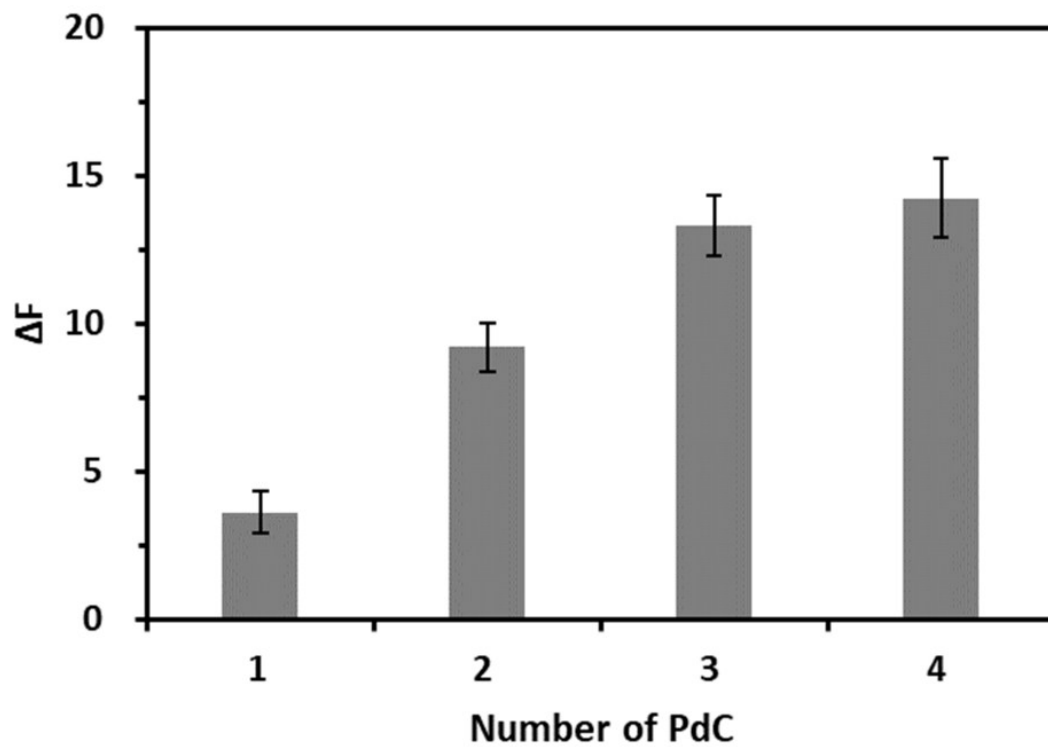

**Fig. S1** The effect of the number of PdC on hybridization-induced fluorescence signal change.  $\Delta F$  is defined as  $F_0 - F$  where  $F_0$  and  $F$  are fluorescence signal intensities measured before and after addition of complementary DNA strand, respectively.

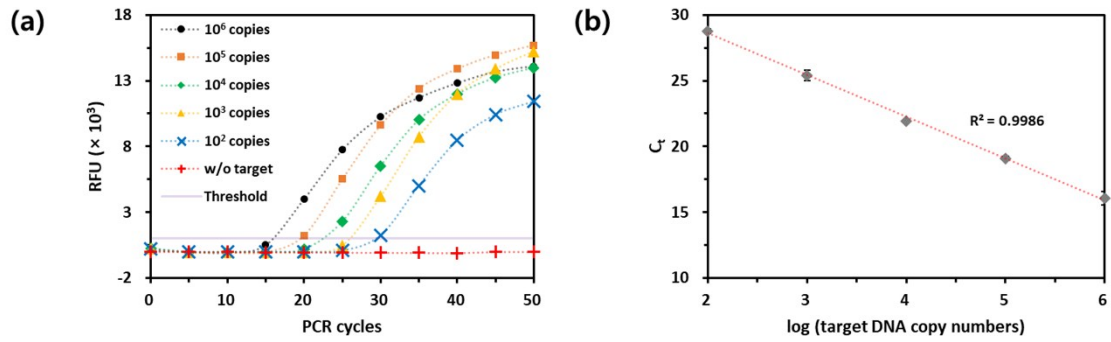

**Fig. S2** Quantitative analysis of target nucleic acids from CT using TaqMan probe-based qPCR method. (a) Real-time fluorescence signals from the reaction solutions with varying initial copy numbers of target nucleic acids. (b) Linear relationship between  $C_t$  and logarithm of initial copy number of target nucleic acids ( $10^2 - 10^6$  copies).

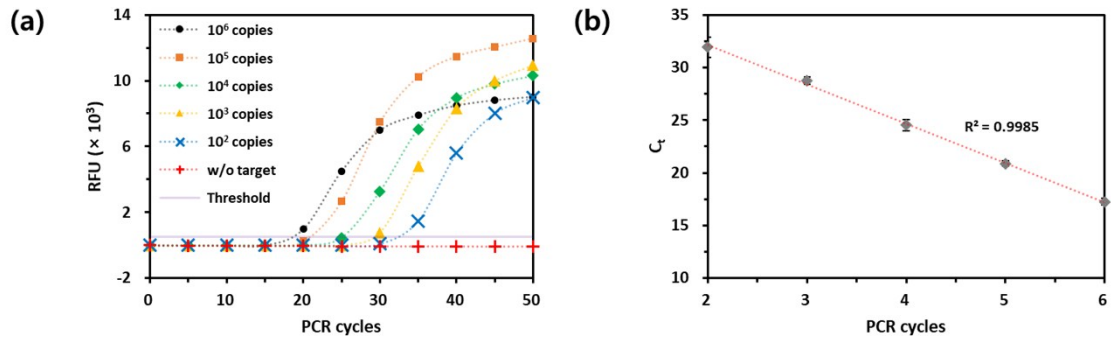

**Fig. S3** Quantitative analysis of target nucleic acids from MH using TaqMan probe-based qPCR method. (a) Real-time fluorescence signals from the reaction solutions with varying initial copy numbers of target nucleic acid. (b) Linear relationship between  $C_t$  and logarithm of initial copy number of target nucleic acids ( $10^2 - 10^6$  copies).
